# Supplementary material for: Anti-microRNA-378a Enhances Wound Healing Process by Upregulating Integrin Beta-3 and Vimentin
Source: PubMed Central journal article supplement — Mol Ther. 2014 Aug 5;22(10):1839–50. doi: 10.1038/mt.2014.115 (PMC4428398; doi:10.1038/mt.2014.115), 2014-08-05
Supplement: mt2014115x1.pdf [file mt2014115x1.pdf]

**a**

| primers                     | sequences                                          |
|-----------------------------|----------------------------------------------------|
| mu-integrinb3-R378-SacI     | 5' cc <b>gagctc</b> ggcttagtggtgggagtacagtag       |
| mu-integrinb3-R378-Mlul     | 5' cc <b>accgct</b> ctt cct gttg tct ca ga ca gaga |
| mu-integrinb3-R378-Mlul-mut | 5' cc <b>accgct</b> cttctctgttgcctcagacagagaccaccg |
| Pre-miR378F                 | 5' agggctcctgactccagg                              |
| Pre-miR378R                 | 5' agg ccttc tg ac tcc aag                         |
| hsa-miR-378                 | 5' ctctgactccaggctcctgtgt                          |
| miR-378N                    | 5' <b>agatct</b> agggctcctgactcc                   |
| miR-378C                    | 5' agg cct tct gac tcc aag tcc                     |
| anti-mir-378                | 5' ggtaacacacaggacctg                              |
| miR378-truncated            | 5' tccaggctcctgtgtttaccta                          |
| mo-Gapdh1F                  | 5' atg gtg aag gtc tgt gtg atc atc                 |
| mo-Gapdh250R                | 5' tgg gtt ctc act cct gga aga agg                 |

**b**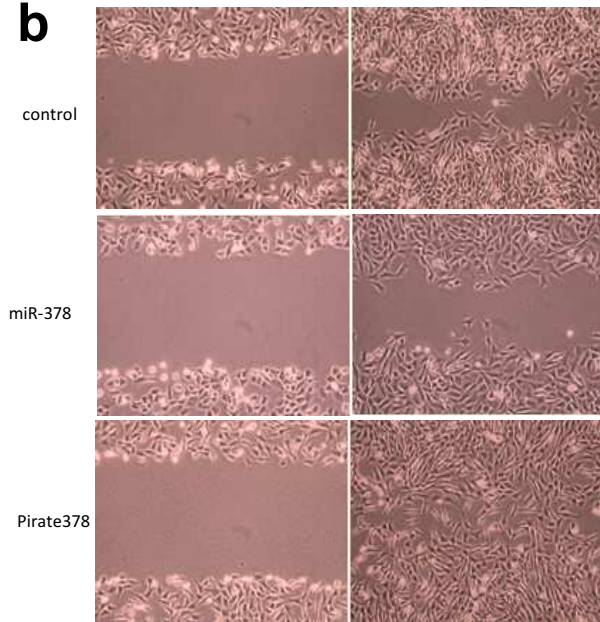**c**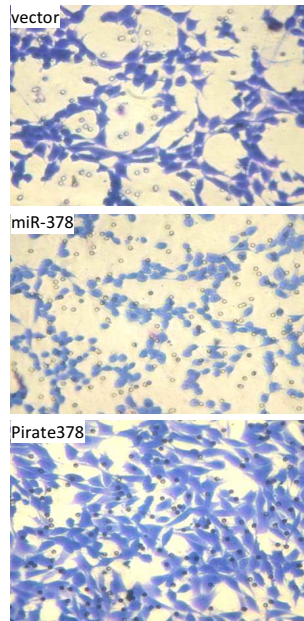**d**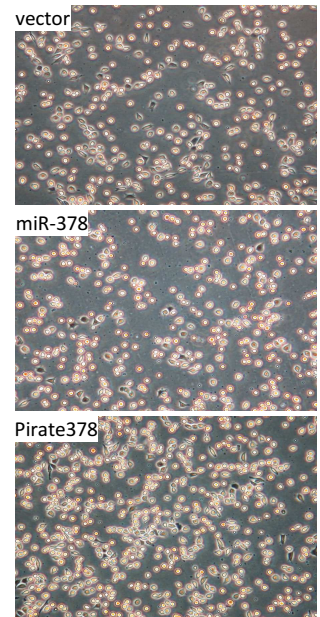**e**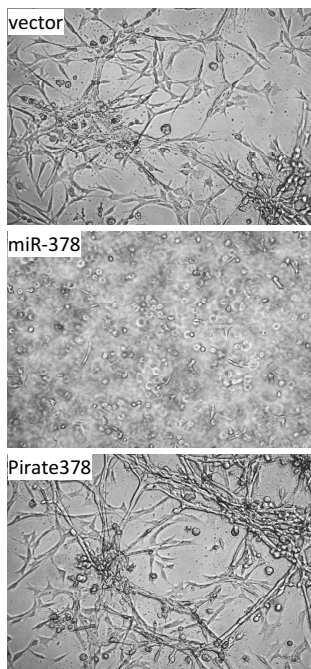

**Three dimensional endothelial tube formation assay.** *In vitro* collagen matrix based three dimensional endothelial lumen formation was performed as previously described by George Davis's lab [Koh, W, Stratman, AN, Sacharidou, A, and Davis, GE (2008) *Methods in enzymology* **443**: 83-101]. In brief, HUVEC cells were suspended to obtain a concentration of  $10^7$  cells/mL. Collagen type I (GIBCO) at a concentration of 3 mg/mL was mixed with  $\text{dH}_2\text{O}$ , 1N NaOH and 10x PBS according to the manufacturer's instructions. 100  $\mu\text{L}$  of HUVEC cells were added to the collagen solution for a final concentration of  $10^6$  cells/mL and slowly pipetted into 48-well plate. The plate was incubated in a 37  $^\circ\text{C}$ , 95% humidity incubator for 30 minutes to allow collagen to polymerize. NIH3T3 cells transfected with different constructs were resuspended in 200  $\mu\text{L}$  DMEM media for a density of  $10^6$  cells/mL and added into each well as feeding cells providing secreted molecules. Tube formation was examined by light microscopy at 12, 24 and 48 hours.

**f**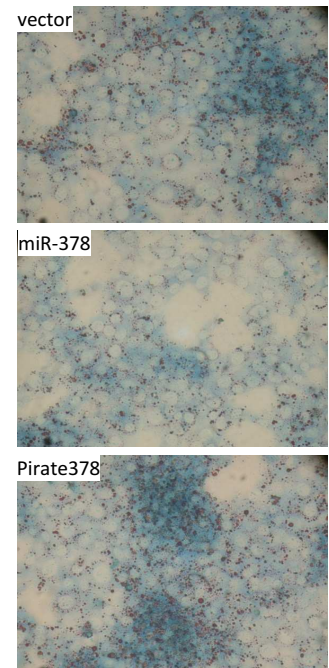

Fig S1. Effects of miR-378a on cell activities. (a) Primers used in this study. (b) In scratch wound healing test, overexpression of miR-Pirate378a increased cell migration while overexpression of miR-378a-5p inhibited cell motility. (c) In transwell migration test, more miR-Pirate378a-transfected cells migrated through the membrane than the other two groups. (d) NIH/3T3 cells were incubated on Petri-dish for two hours to test adhesion. The miR-378a cells adhered slower while the miR-Pirate378a cells adhered faster than the control. (e) In tube-like structure formation assay, tube formation was suppressed in the miR-378a-transfected cells but promoted by transfection with miR-Pirate378a. (f) In differentiation assay for cells stained with Oil-Red-O, transfection with miR-378a inhibited cell differentiation while overexpression of miR-Pirate378a promoted differentiation.
