# Supplementary material for: Anti-microRNA-378a Enhances Wound Healing Process by Upregulating Integrin Beta-3 and Vimentin
Source: PubMed Central journal article supplement — Mol Ther. 2014 Aug 5;22(10):1839–50. doi: 10.1038/mt.2014.115 (PMC4428398; doi:10.1038/mt.2014.115), 2014-08-05
Supplement: mt2014115x2.pdf [file mt2014115x2.pdf]

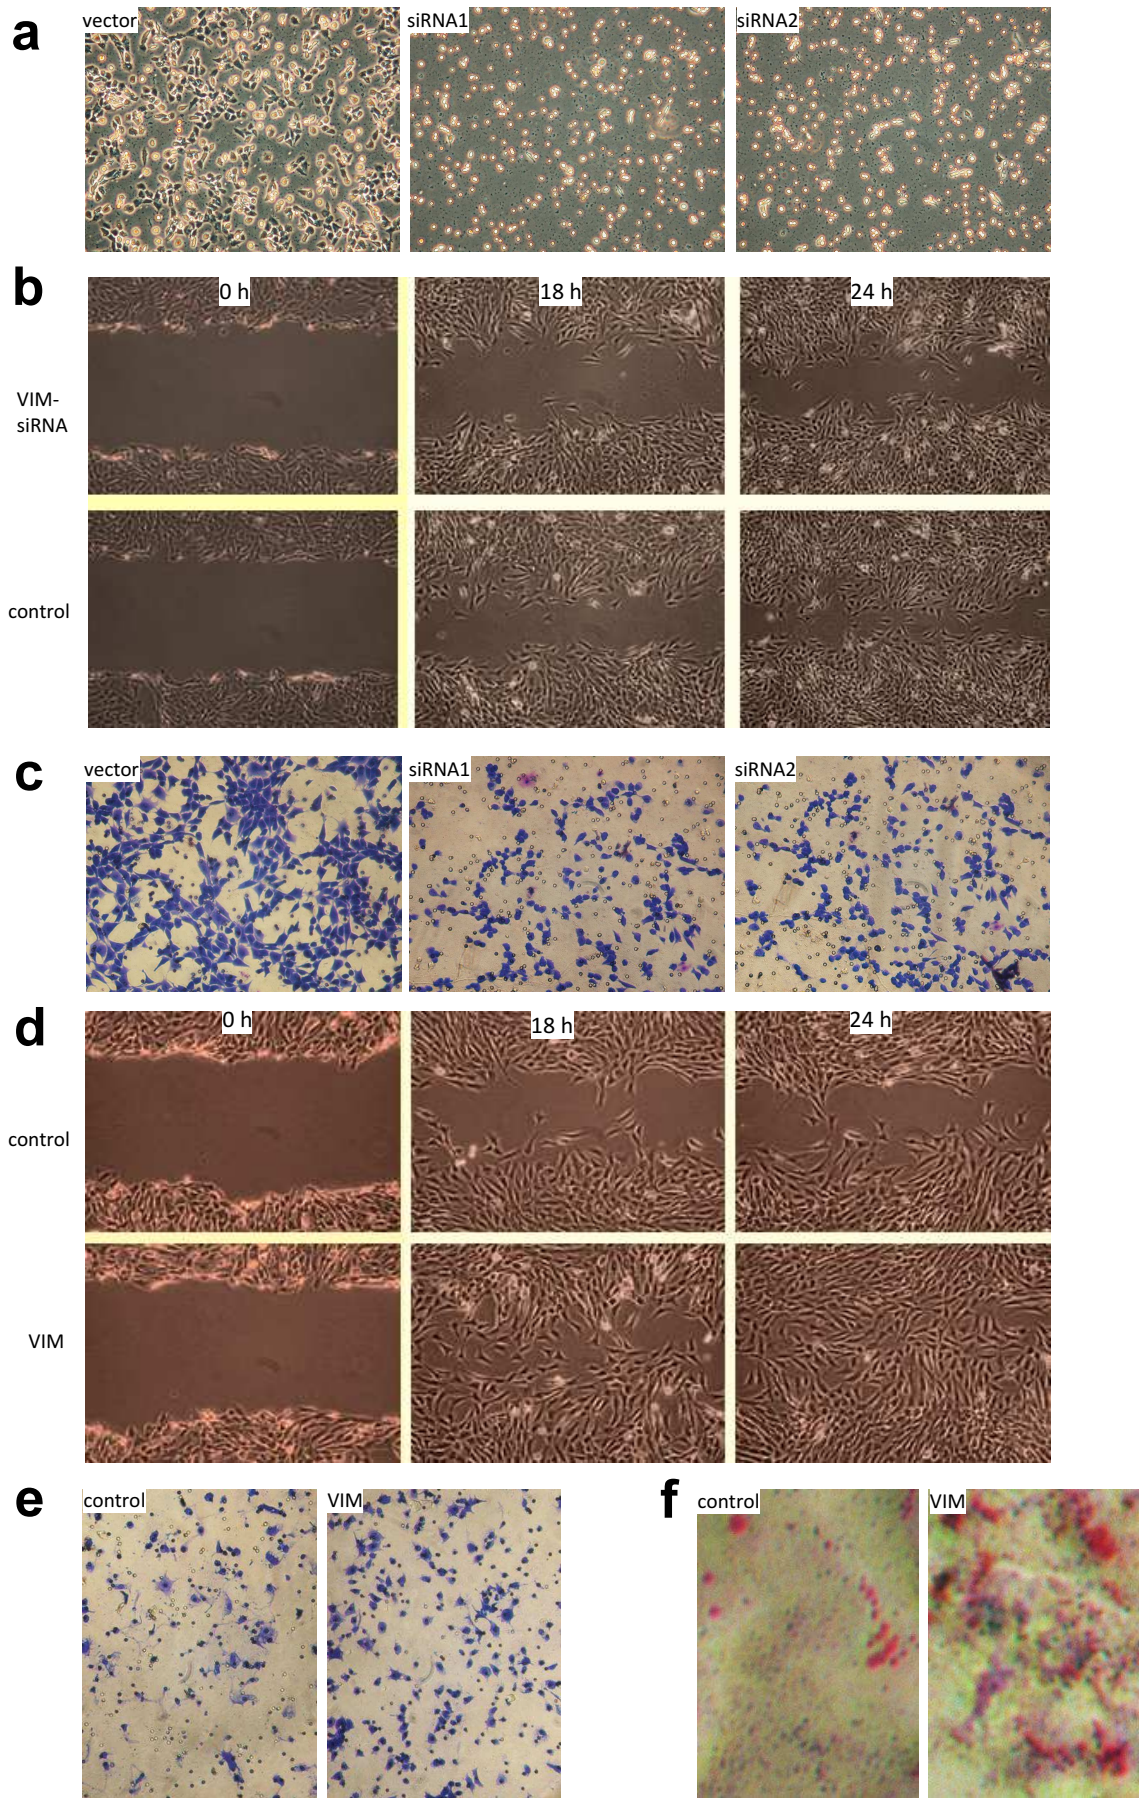

Fig S2. Effects of vimentin on cell activities. Transfection with siRNAs targeting vimentin decreased cell adhesion (a), migration (b), and invasion (c). Ectopic expression of vimentin enhanced cell migration (d), invasion (e), and differentiation (f).
