# Supplementary material for: Anti-microRNA-378a Enhances Wound Healing Process by Upregulating Integrin Beta-3 and Vimentin
Source: PubMed Central journal article supplement — Mol Ther. 2014 Aug 5;22(10):1839–50. doi: 10.1038/mt.2014.115 (PMC4428398; doi:10.1038/mt.2014.115), 2014-08-05
Supplement: mt2014115x3.pdf [file mt2014115x3.pdf]

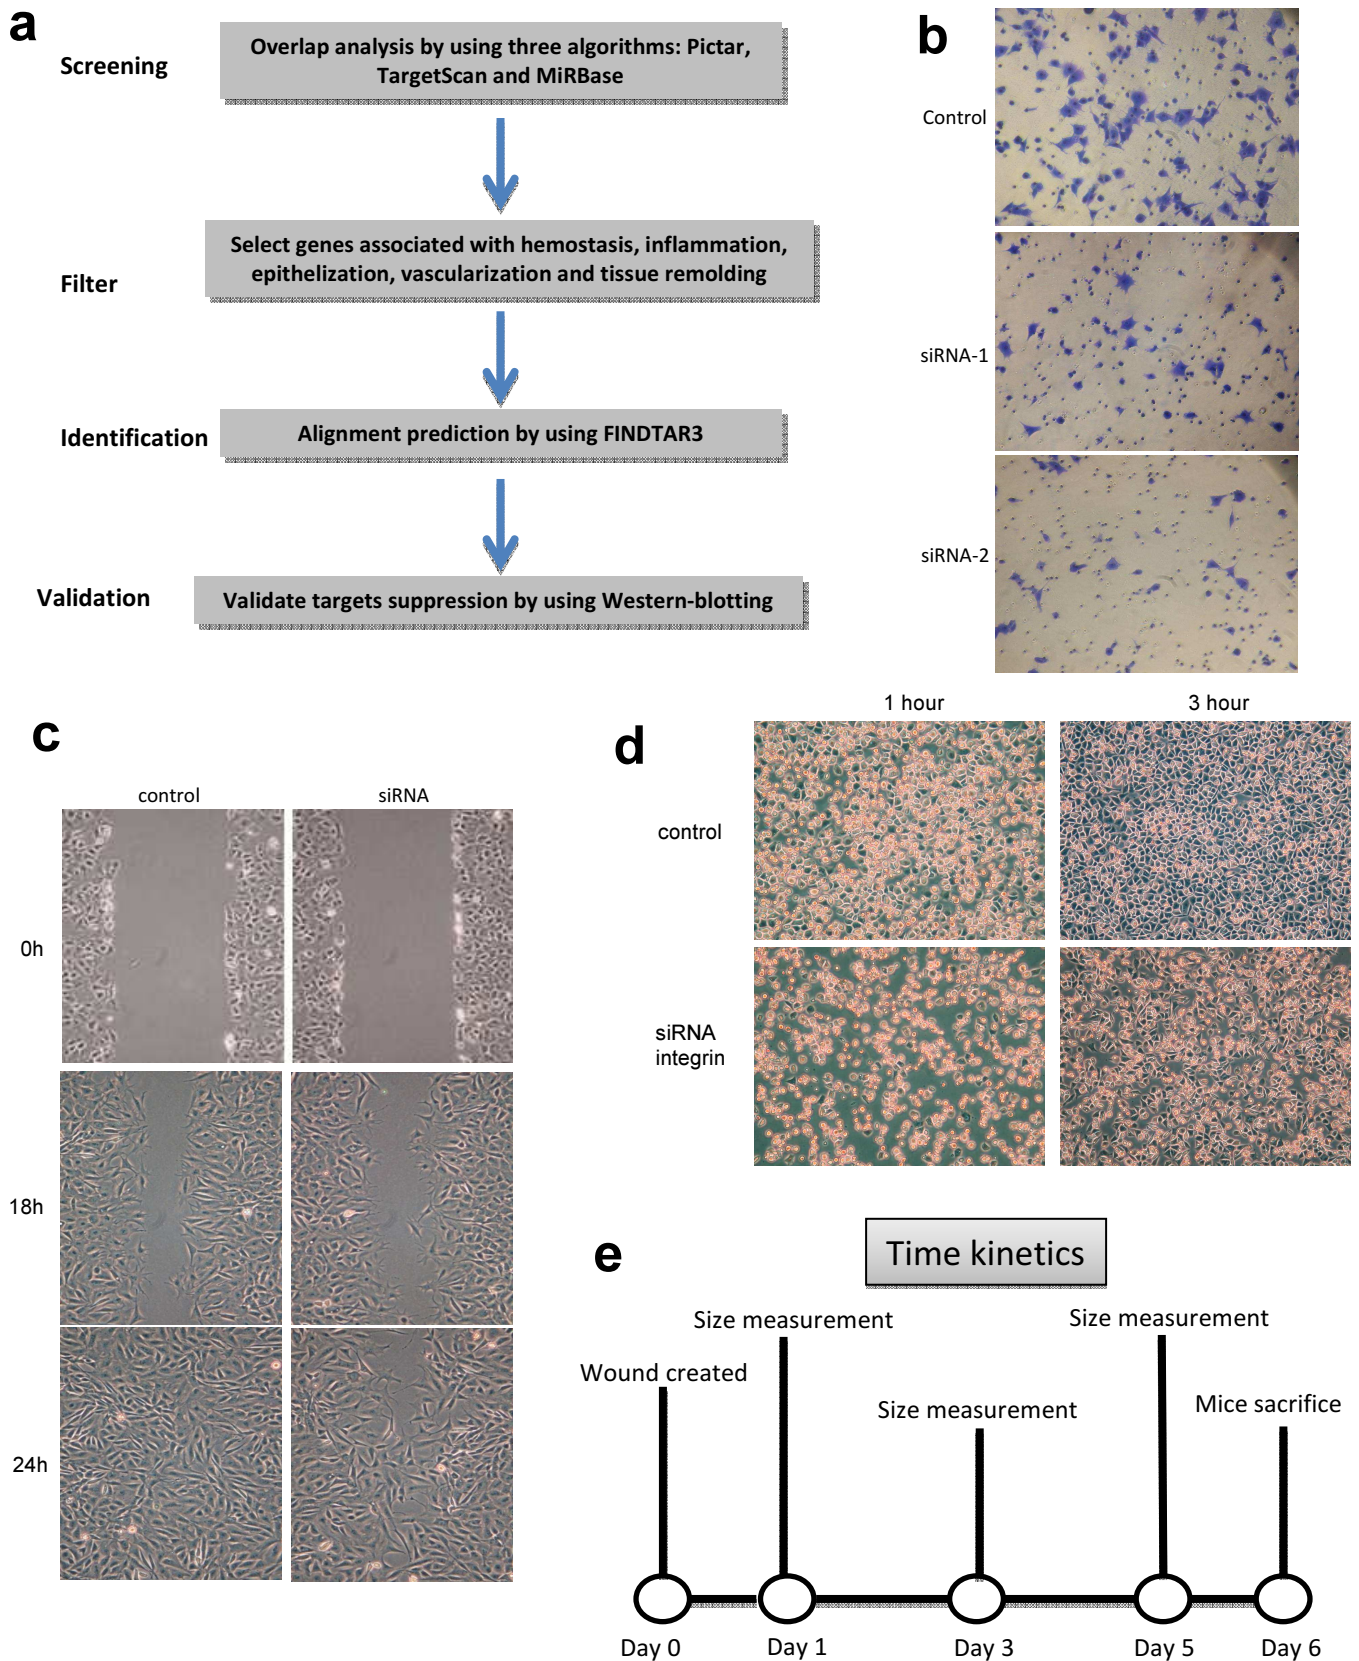

Fig S3. Effects of integrin beta-3 on cell activities. (a) Summary of miR-378s target identification. (b-d) Transfection with siRNAs targeting integrin beta-3 decreased cell invasion (b), migration (c), and adhesion (d). Major steps involved in skin wound healing assay (e).
